# Modeling the USA Winter 2021 Update and Spring 2022 CoVID-19 Resurgence

Genghmun Eng

PhD Physics 1978, University of Illinois at Urbana-Champaign

June 24, 2022

## Abstract

Every USA wave, including this latest Spring 2022 Resurgence has been successfully modeled using:

$$N(t) \approx \max[N_o \exp\{+(t/[t_R(1 + \alpha_S t)]) \exp(-\delta_o t)\}],$$

with  $N(t)$  being the total number of new CoVID-19 cases above a prior baseline, and  $t_R$  setting the pandemic wave doubling time  $t_{dbl} = t_R(\ln 2)$ . The parameters  $\{\alpha_S; \delta_o\}$  measure mitigation efforts among the *uninfected population*. Here,  $\{\alpha_S > 0\}$  is associated with *Social Distancing* and *vaccinations*; while  $\{\delta_o > 0\}$  is associated with *mask-wearing*, which results in faster  $\frac{d}{dt}N(t)$  post-peak *drop-offs*. The predicted pandemic wave end is when the calculated  $N(t)$  stops increasing.

The USA Winter 2021 Resurgence resulted in fewer *Omicron* CoVID-19 cases than calculated in our prior *medrxiv.org* preprint\*, due to an increased  $\delta_o$  component, which gives  $\sim 3/11/22$  as the predicted wave end. A relatively quiet CoVID-19 period ensued until  $\sim 4/16/22$ , when a new *Omicron* variant caused the present Spring 2022 CoVID-19 resurgence.

The recent CoVID-19 waves have decreasing  $t_R$  values, with the Spring 2022  $t_R \approx 3.55$  days ( $t_{dbl} \approx 2.46$  days) value being the shortest since the initial 2020 pandemic, indicating increasingly infectious variants. The Winter 2021 and the present Spring 2022 CoVID-19 resurgences have identical  $\alpha_S \approx 0.043$  / day values, but the  $\delta_o > 0$  *mask-wearing* parameter decreased from  $\delta_o \approx 3.14 \times 10^{-3}$  / day to  $\delta_o \approx 1.145 \times 10^{-3}$  / day, giving the Spring 2022 wave a longer tail, and an expected end date of 8/25/22, with these wave totals:

$$N_o(t = [4/16/22]) = 61,950 ; N(t = [8/25/22]) \approx 7,440,800.$$

When all the USA CoVID-19 waves are combined, it gives:

$$N_{tot}(t = [6/19/22]) \approx 86,055,800 \text{ vs } N_{data} = 86,230,982 ;$$

$$N_{tot}(t = [8/25/22]) \approx 88,138,600 ;$$

assuming no future CoVID-19 Resurgences (*with 5 Figures*).

\*([10.1101\\_2022.02.04.22270491](https://doi.org/10.1101/2022.02.04.22270491))

Email: [geng001@social.rr.com](mailto:geng001@social.rr.com)

## 1 Introduction

Each USA CoVID-19 wave<sup>1–8</sup>, from the pandemic start (3/21/20) to the present day (6/19/22), has been successfully modeled using the following basic  $N(t)$  function for the total number of new CoVID-19 cases above a prior baseline:

$$N(t) \approx \max[N_o \exp\{+(t / [t_R(1 + \alpha_S t)]) \exp(-\delta_o t)\}], \quad [1.1]$$

with  $t_R$  setting the pandemic doubling time  $t_{dbl} = t_R(\ln 2)$ , as in standard **SEIR** (Susceptible, Exposed, Infected, Recovered or Removed) epidemiology models. Mitigation efforts among the *uninfected population* in Eq. [1.1] has  $\alpha_S > 0$  associated with *Social Distancing* and *vaccinations*; and  $\delta_o > 0$  associated with *mask-wearing*, which results in a faster  $\frac{d}{dt}N(t)$  post-peak *drop-off*. The predicted pandemic wave end is when the calculated  $N(t)$  stops increasing.

Given a total population of  $N_{ALL}$ , the *uninfected population*  $U(t)$  is:

$$U(t) = [N_{ALL} - N(t)]. \quad [1.2]$$

Using Eq. [1.1] assumes  $N(t) \ll N_{ALL}$ , so that pandemic saturation effects can be ignored. Also, **SEIR** models do not generally include what the  $U(t)$  *uninfected population* is doing in response to the pandemic. In contrast, Eq. [1.1] was developed as a *non-local* extension of **SEIR** models, to account for how the *uninfected population*, as a whole, is mitigating the pandemic spread.

Each new USA CoVID-19 wave starts with a sharp rise in the total number  $N(t)$  of new cases, with the  $t = 0$  point for each wave being determined by when the resurgence is first easily identified, where  $N(t = 0) = N_o$  is the number of cases above baseline at that time. Although Eq. [1.1] does not predict when each new CoVID-19 wave starts, or what conditions are causing the new wave, once the CoVID-19 wave becomes established, Eq. [1.1] appears to successfully predict its time evolution.

The fact that the same few parameters in Eq. [1.1] have successfully modeled the time evolution of each USA CoVID-19 wave<sup>1–8</sup>, shows that the **response** of the  $U(t)$  *uninfected population* has been similar for each wave, even though different factors may have been driving each CoVID-19 resurgence. All CoVID-19 data used here came from the open-source *bing.com* CoVID-Tracker<sup>9</sup> database.

## 2 Winter 2021 / Spring 2022 CoVID-19 Update

Our prior *medrxiv.org* preprint<sup>8</sup> for the Winter 2021 resurgence showed an *initial* stage (11/15/21–12/25/21) which had practically no *mask-wearing* effects [ $\delta_o < 0.001 \times 10^{-3} / \text{day}$ ], likely due to the *Omicron* variant infecting vaccinated people who thought they were protected. It was followed by a *latter* post-Christmas stage (12/25/21–1/31/22), having these parameter values:

$$N_o(12/25/21 - 1/31/22) \approx 3,121,000; \quad [2.1a]$$

$$t_R(12/25/21 - 1/31/22) \approx 7.636 \text{ days}; \quad [2.1b]$$

$$t_{dbl}(12/25/21 - 1/31/22) \approx 5.293 \text{ days}; \quad [2.1c]$$

$$\alpha_S(12/25/21 - 1/31/22) \approx 0.03168 / \text{day}; \quad [2.1d]$$

$$\delta_o(12/25/21 - 1/31/22) \approx 0.96 \times 10^{-3} / \text{day}. \quad [2.1e]$$

The  $N_o(12/25/21) = 3,121,000$  starting point for a behavior change in  $N(t)$  was similar to the *latter* stage of the Summer 2021 Resurgence<sup>6</sup>, which also showed a behavior change in  $N(t)$  starting at  $N_o(8/13/21) = 3,200,000$ . This commonality shows that the *uninfected population* altered its behavior at similar points, which is likely when people realized that some hospitals would be overwhelmed.

A further update for the US Winter 2021 CoVID-19 Resurgence is presented here in *Figs. 1-2*, which shows that a significant increase in *mask-wearing* in early 2022 likely helped to curtail this CoVID-19 resurgence, making it less pernicious than Eqs. [2.1a]-[2.1e] initially indicated. The final fit for this *latter* part of the Winter 2021 resurgence has these updated values:

$$N_o(12/25/21 - 3/11/22) \approx 3,000,000 ; \quad [2.2a]$$

$$t_R(12/25/21 - 3/11/22) \approx 6.14 \text{ days} ; \quad [2.2c]$$

$$t_{dbl}(12/25/21 - 3/11/22) \approx 4.256 \text{ days} ; \quad [2.2c]$$

$$\alpha_S(12/25/21 - 3/11/22) \approx 0.043 / \text{day} ; \quad [2.2d]$$

$$\delta_o(12/25/21 - 3/11/22) \approx 3.14 \times 10^{-3} / \text{day} . \quad [2.2e]$$

The major change was a more than three-fold increase in the critical *mask-wearing*  $\delta_o$ -parameter. This updated data and model for the US Winter 2021 CoVID-19 Resurgence also provides a better baseline for follow-on resurgences. While *Fig. 2* only presents the modeling results of Eq. [2.2a]-[2.2e] through 3/11/2022, it also includes data up through 6/19/2022. Those data show that the US is now in the midst of a US Spring 2022 CoVID-19 Resurgence, as new CoVID-19 variants continue to infect both vaccinated and unvaccinated people.

Using *Fig. 2* and Eqs. [2.2a]-[2.2e] as a new baseline then determines these parameters for the US Spring 2022 CoVID-19 Resurgence:

$$N_o(4/16/22 - 6/19/22) \approx 61,950 ; \quad [2.3a]$$

$$t_R(4/16/22 - 6/19/22) \approx 3.55 \text{ days} ; \quad [2.3c]$$

$$t_{dbl}(4/16/22 - 6/19/22) \approx 2.461 \text{ days} ; \quad [2.3c]$$

$$\alpha_S(4/16/22 - 6/19/22) \approx 0.043 / \text{day} ; \quad [2.3d]$$

$$\delta_o(4/16/22 - 6/19/22) \approx 1.145 \times 10^{-3} / \text{day} . \quad [2.3e]$$

*Figure 3* compares the Eq. [2.3a]-[2.3e] predictions for the Spring 2022 resurgence to the data above baseline. The combined model for all the US CoVID-19 waves is shown in *Fig. 4*, going back to March 2020.

While Eq. [1.1] captures the overall structure of each new CoVID-19 wave, it does not successfully model the lowest values for the long-term tail of the daily CoVID-19 infections. It also does not predict when the next resurgence begins, since that  $t = 0$  point is a model-adjusted input parameter determined by when the new resurgence is first easily identified. Both these aspects are apparent in the *Fig. 4* modeling gap between the 3/11/22 predicted end of the Winter 2021 Resurgence, and 4/16/22, when the Spring 2022 Resurgence reached its  $N_o(4/16/22) \approx 61,950$  initial modeling threshold. These results also mean that the US was nearly free of CoVID-19 between these two pandemic waves.

:

### 3 Summary

Our empirical modeling of the various USA CoVID-19 pandemic waves shows that there is a fairly consistent range of responses by the *uninfected population* to the various CoVID-19 waves, even though each wave may have had a different dominant root-cause. *Figure 5* tabulates all the model parameters that were derived for each CoVID-19 wave.

It is now generally accepted that *Omicron* evades the CoVID-19 vaccines, but that vaccination still offers protection against hospitalization. Since this variant was detected in Nov. 2021, our modeling since then (*Fig. 5: CoVID Waves 6, 6-A, and 7*) shows that each *Omicron* wave was intrinsically more infectious, with  $t_{dbl}$  values decreasing from  $\sim 5.58$  days down to its most recent value of  $\sim 2.46$  days, which is shorter than every wave, except for the initial March 2020 pandemic value of  $\sim 2.00$  days.

Because the initial *Omicron CoVID-19* wave caught the vaccinated population by surprise, it had a low  $\alpha_S \approx 0.011$  / day value, with virtually no *mask-wearing* effects ( $\delta_o \lesssim 0.001 \times 10^{-3}$  / day). However, the post-Christmas data showed a significant increase in *Social Distancing*, which gave  $\alpha_S \approx 0.043$  / day for both the *latter* part of the Winter 2021 Resurgence, and for the present follow-on Spring 2022 Resurgence. The  $\delta_o$  change from a post-Christmas value of  $\delta_o \approx 3.14 \times 10^{-3}$  / day, to the present Spring 2022 lower value of  $\delta_o \approx 1.145 \times 10^{-3}$  / day, means that this latest wave has a relatively long-tail for the CoVID-19 daily cases, which is also apparent in *Fig. 4*.

These analyses give the following updated USA CoVID-19 projections for the total number of USA CoVID-19 cases:

$$N_{tot}(t = [6/19/22]) \approx 86,055,800 \text{ vs } N_{data} = 86,230,982 ; \quad [3.1a]$$

$$N_{tot}(t = [8/25/22]) \approx 88,138,600 . \quad [3.1b]$$

Unfortunately, the latest international CoVID-19 pandemic data indicates that newer vaccine-evading *Omicron* variants, which are not included in this model, are coming to the USA. Vigilance, *Social Distancing*, and *mask-wearing* will continue to be needed.

### 4 List of Figures

*Fig. 1:* Final Fit, USA Winter 2021 Omicron CoVID-19 Wave by Itself

*Fig. 2:* USA CoVID-19 Totals w/ Data Fitting 3/21/2020 - 3/11/2022

*Fig. 3:* USA CoVID-19 Spring 2022 Resurgence By Itself

*Fig. 4:* USA CoVID-19 Daily and Total, w/ Spring 2022 Resurgence

*Fig. 5:* Summary of CoVID-19 Model and Parameter Values

### 5 References

1. <https://medrxiv.org/cgi/content/short/2020.05.04.20091207v1>  
"Initial Model for the Impact of Social Distancing on CoVID-19 Spread"
2. <https://medrxiv.org/cgi/content/short/2020.06.30.20143149v1>

- “Orthogonal Functions for Evaluating  
Social Distancing Impact on CoVID-19 Spread”
3. <https://medrxiv.org/cgi/content/short/2020.08.07.20169904>  
“Model to Describe Fast Shutoff of CoVID-19 Pandemic Spread”
  4. <https://medrxiv.org/cgi/content/short/2020.09.16.20196063>  
“Initial Model for USA CoVID-19 Resurgence”
  5. <https://medrxiv.org/cgi/content/short/2021.08.16.21262150>  
“The *IHME* vs Me: Modeling USA CoVID-19 Spread,  
Early Data to the *Fifth Wave*”
  6. <https://medrxiv.org/cgi/content/short/2021.10.15.21265078>  
“Updated Model for the USA Summer 2021 CoVID-19 Resurgence”
  7. <https://medrxiv.org/cgi/content/short/2022.01.06.22268868>  
“Modeling the USA Winter 2021 CoVID-19 Resurgence”
  8. <https://medrxiv.org/cgi/content/short/2022.02.04.22270491>  
“USA Winter 2021 CoVID-19 Resurgence Post-Christmas Update”
  9. [www.bing.com/covid/local/unitedstates?form=COVD07](http://www.bing.com/covid/local/unitedstates?form=COVD07)

**Fig. 1: Final USA Winter 2021 Omicron CoVID-19 Wave By Itself**

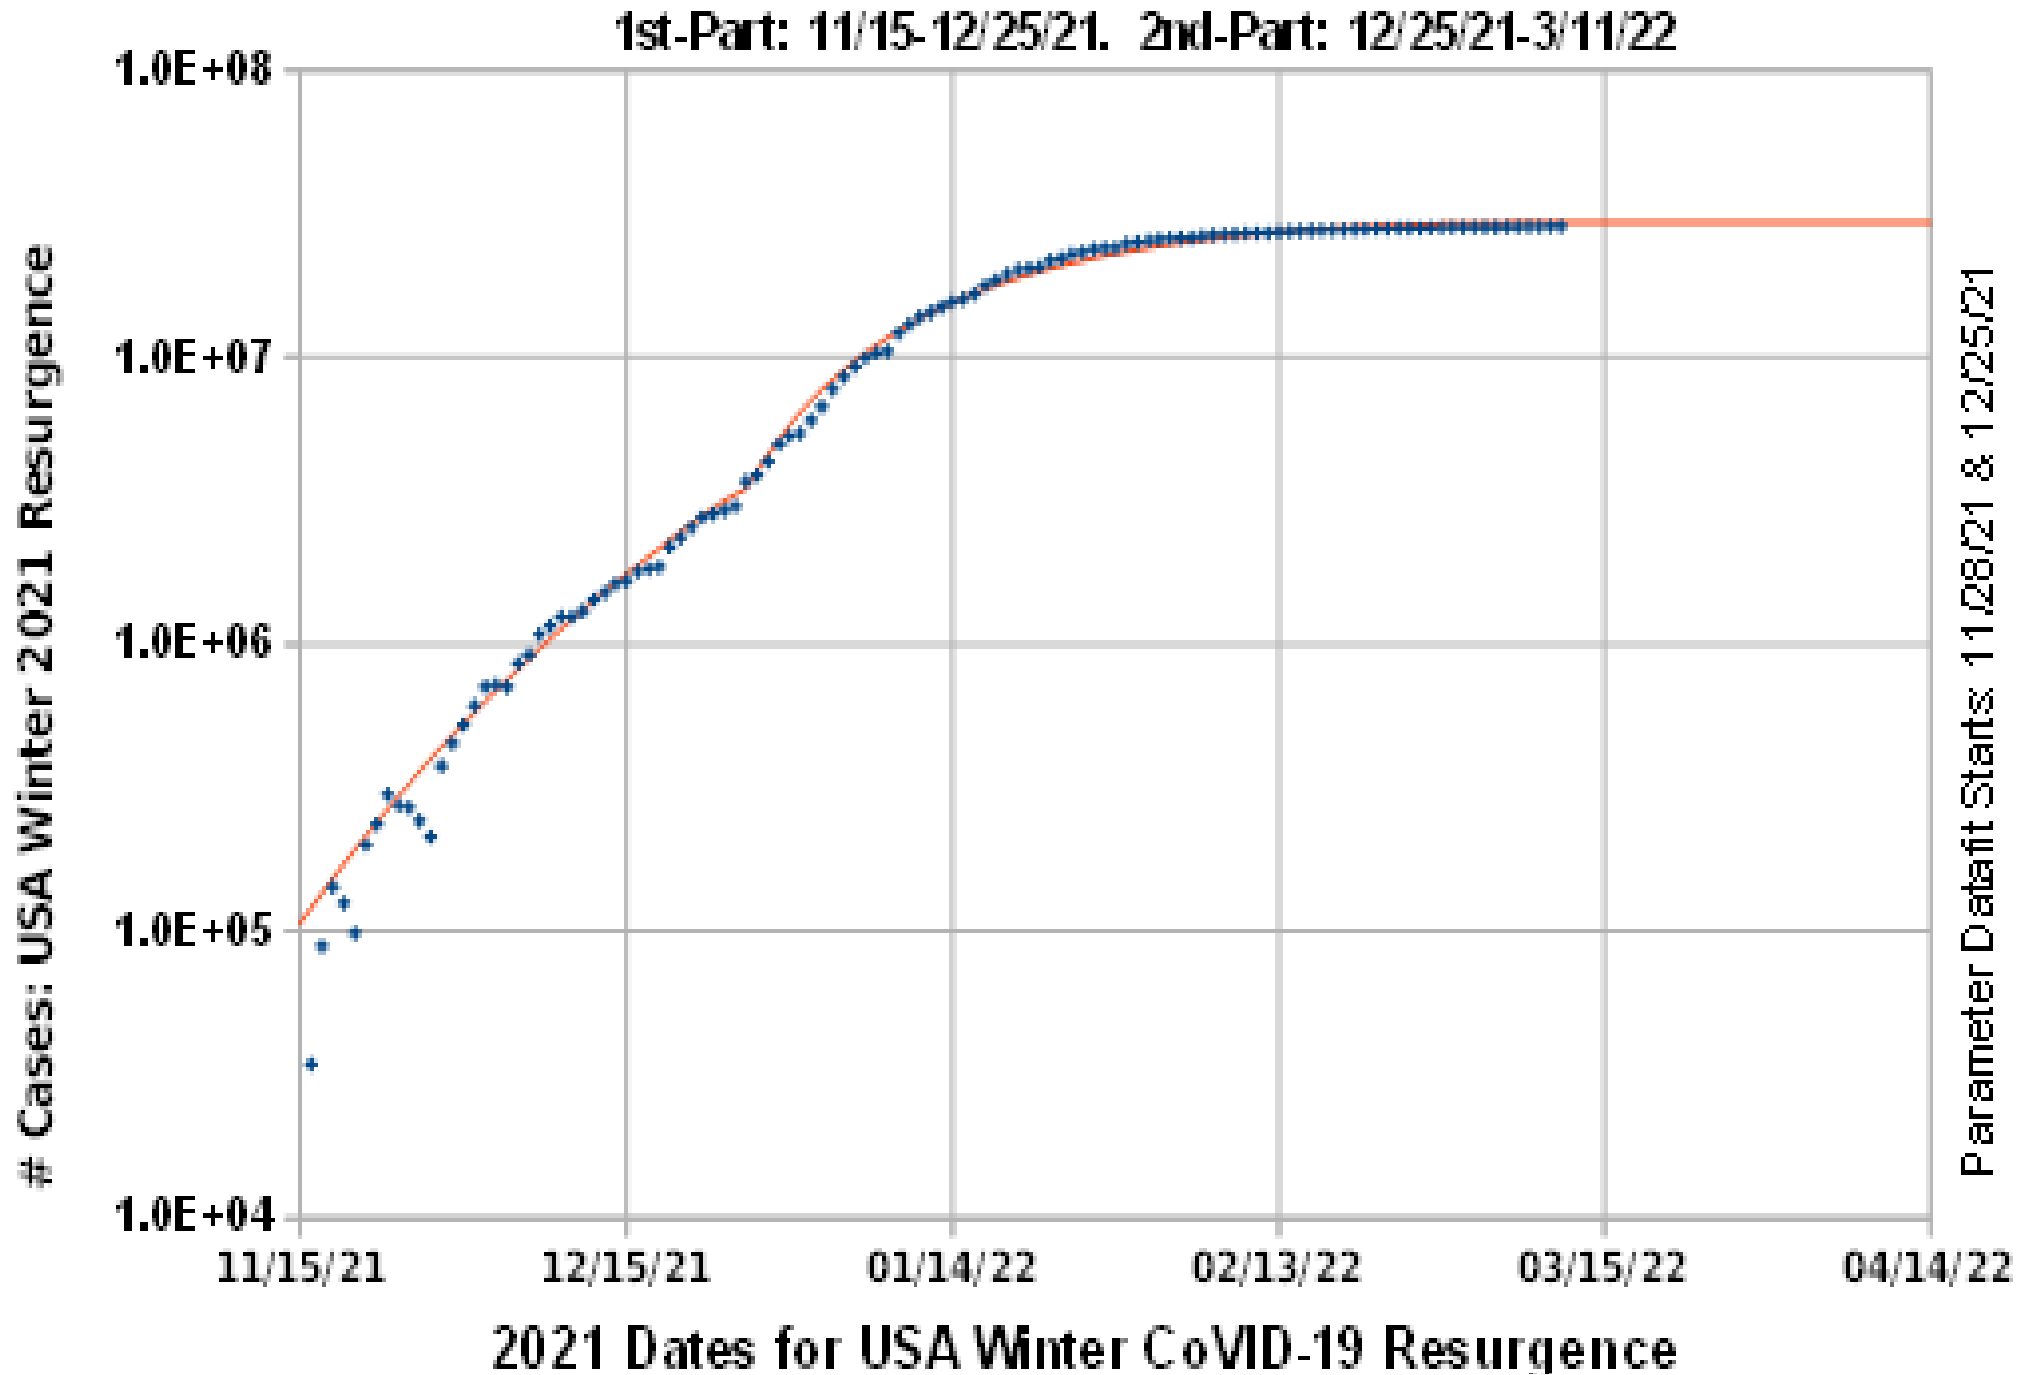

**Fig. 2: USA CoVID-19 Totals w/ Data Fitting 3/21/2020 - 3/11/2022**

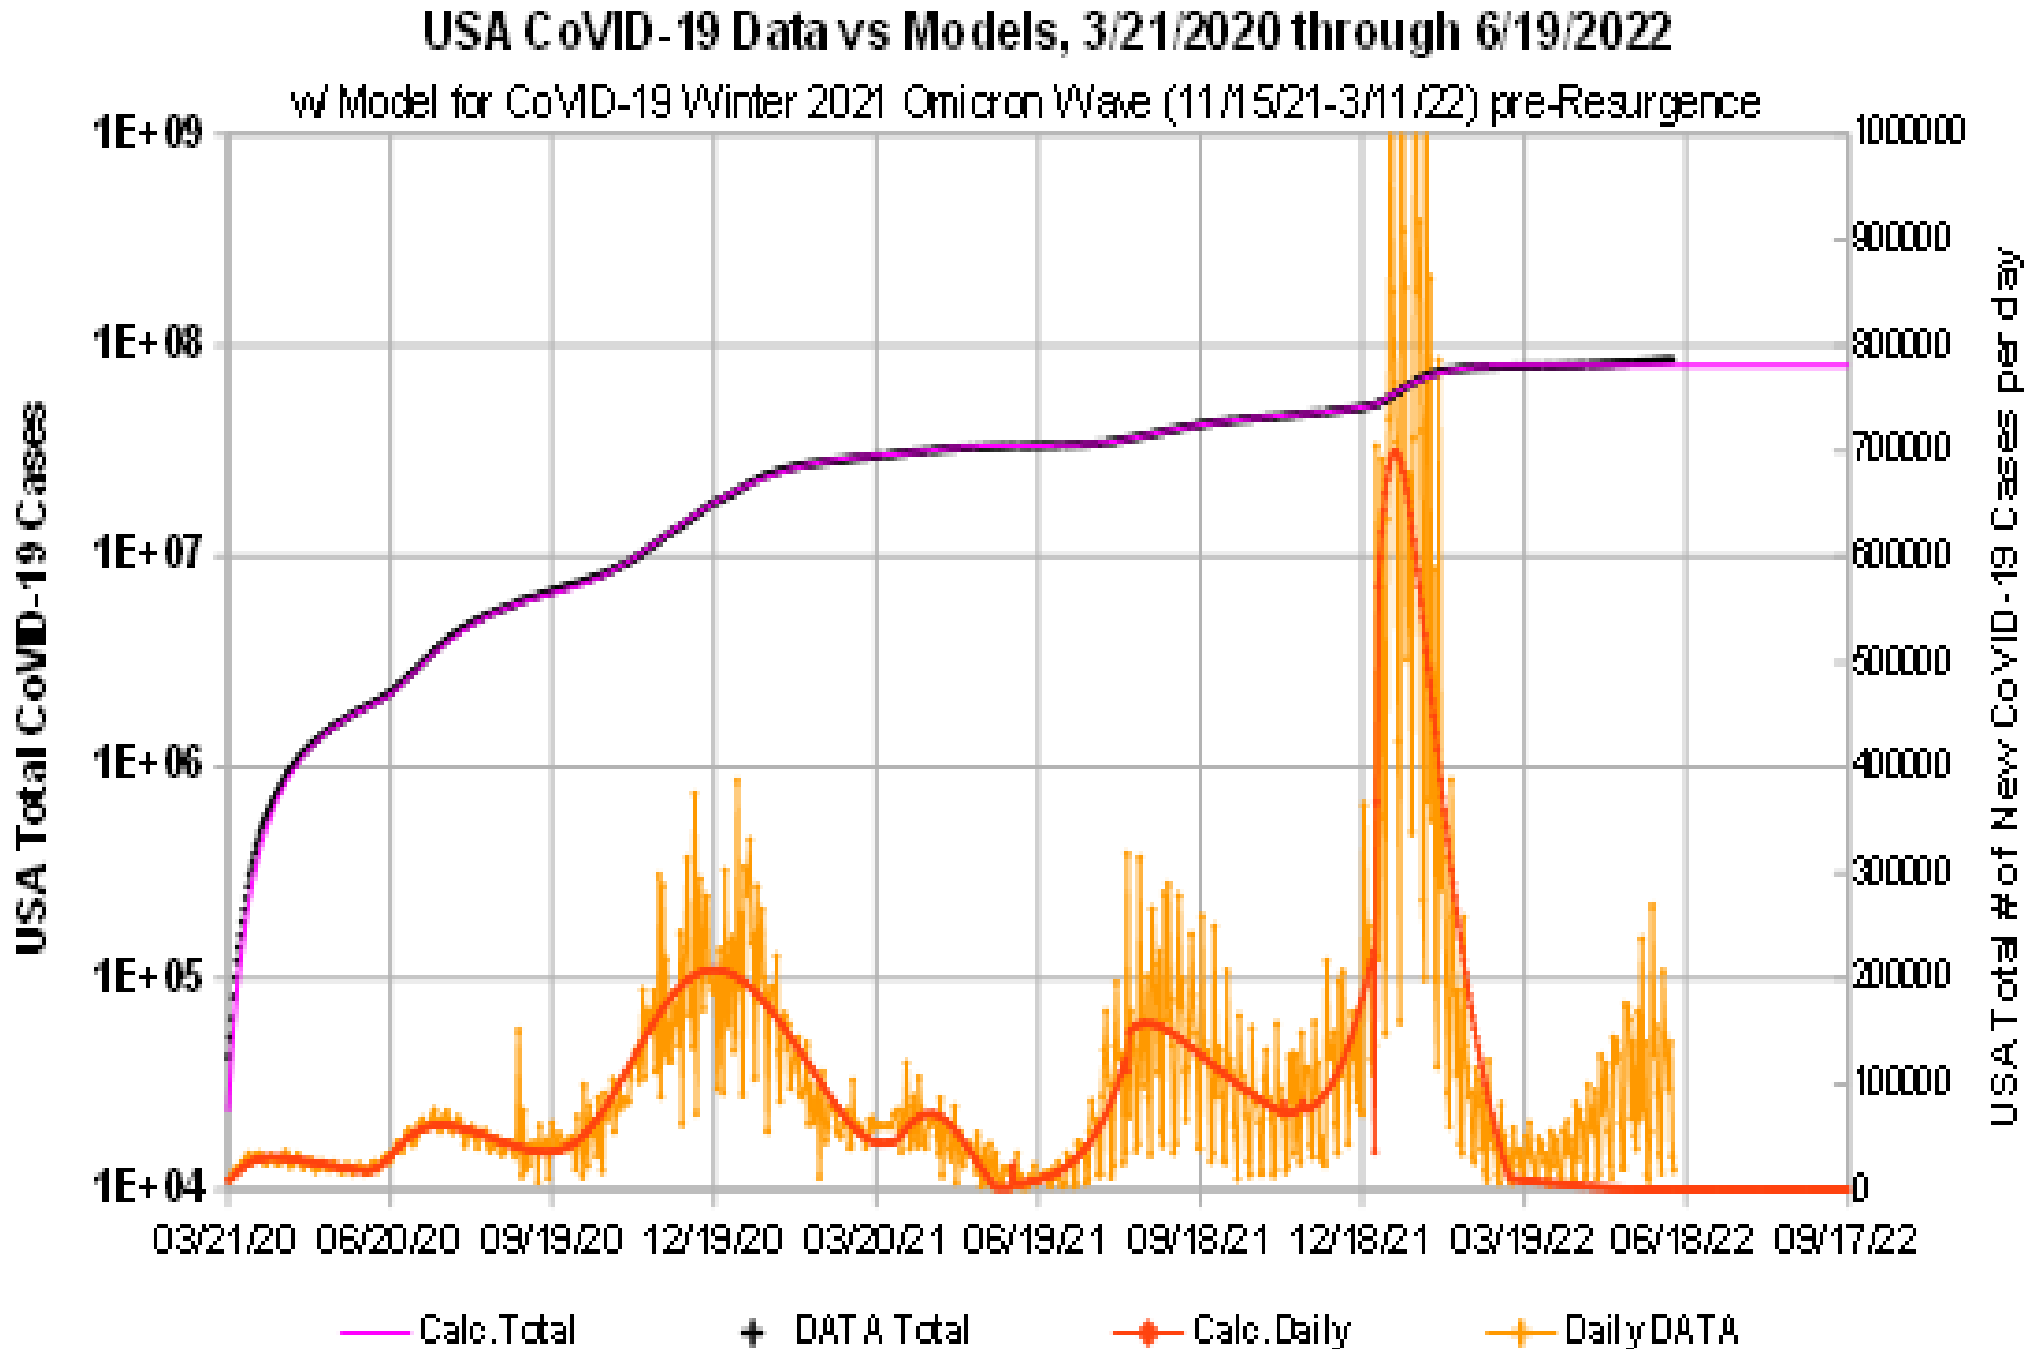

**Fig. 3: USA CoVID-19 Spring 2022 Resurgence By Itself**

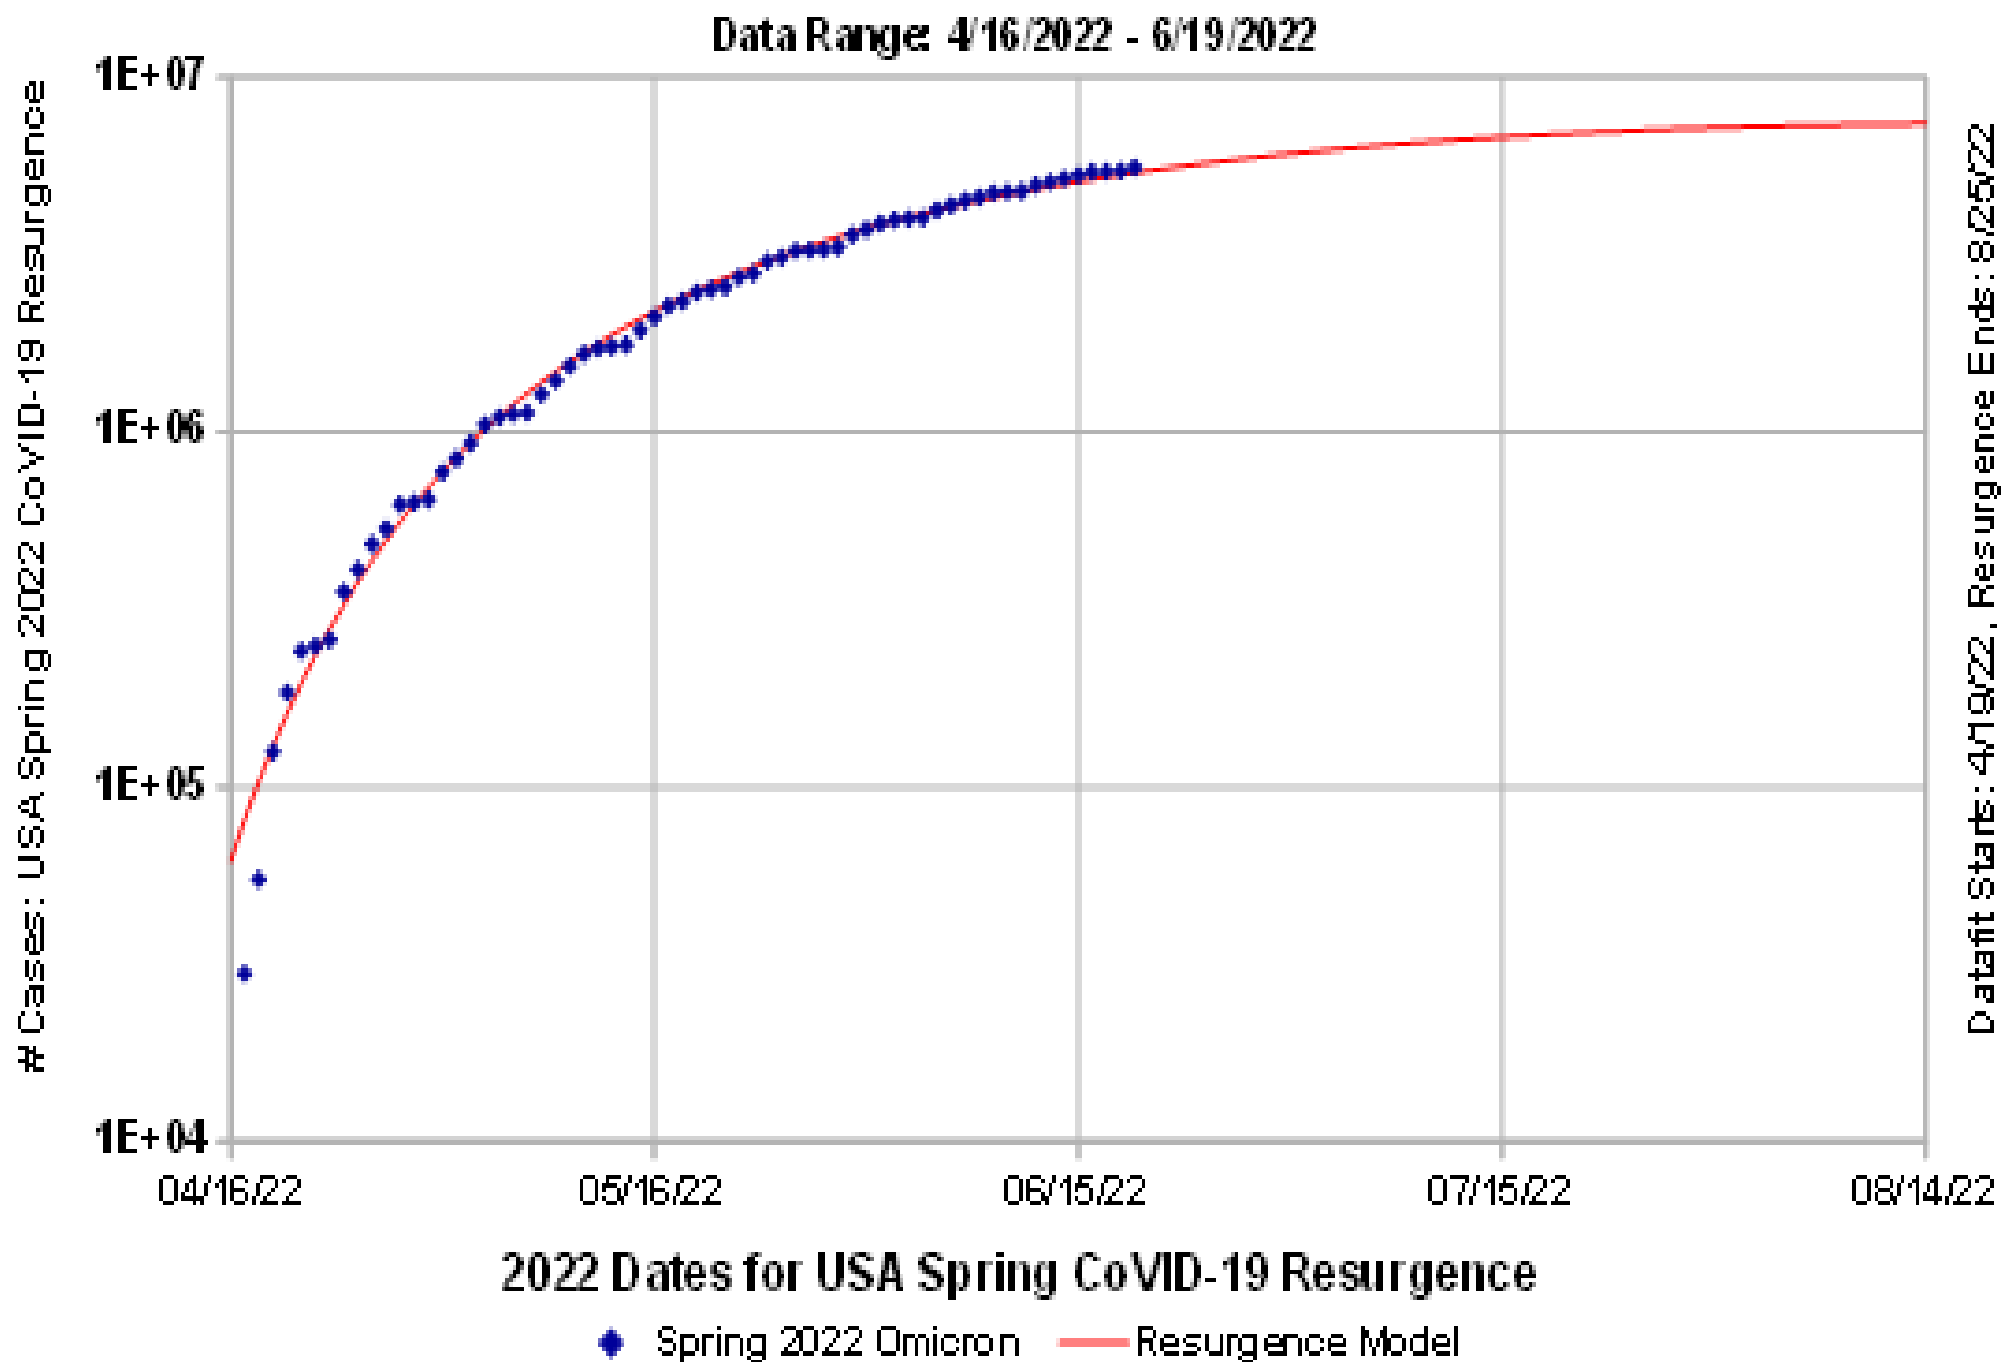



**Fig. 4: USA CoVID-19 Daily and Total, w/ Spring 2022 Resurgence**  
**Data Fits: 3/21/2020- 6/19/2022**

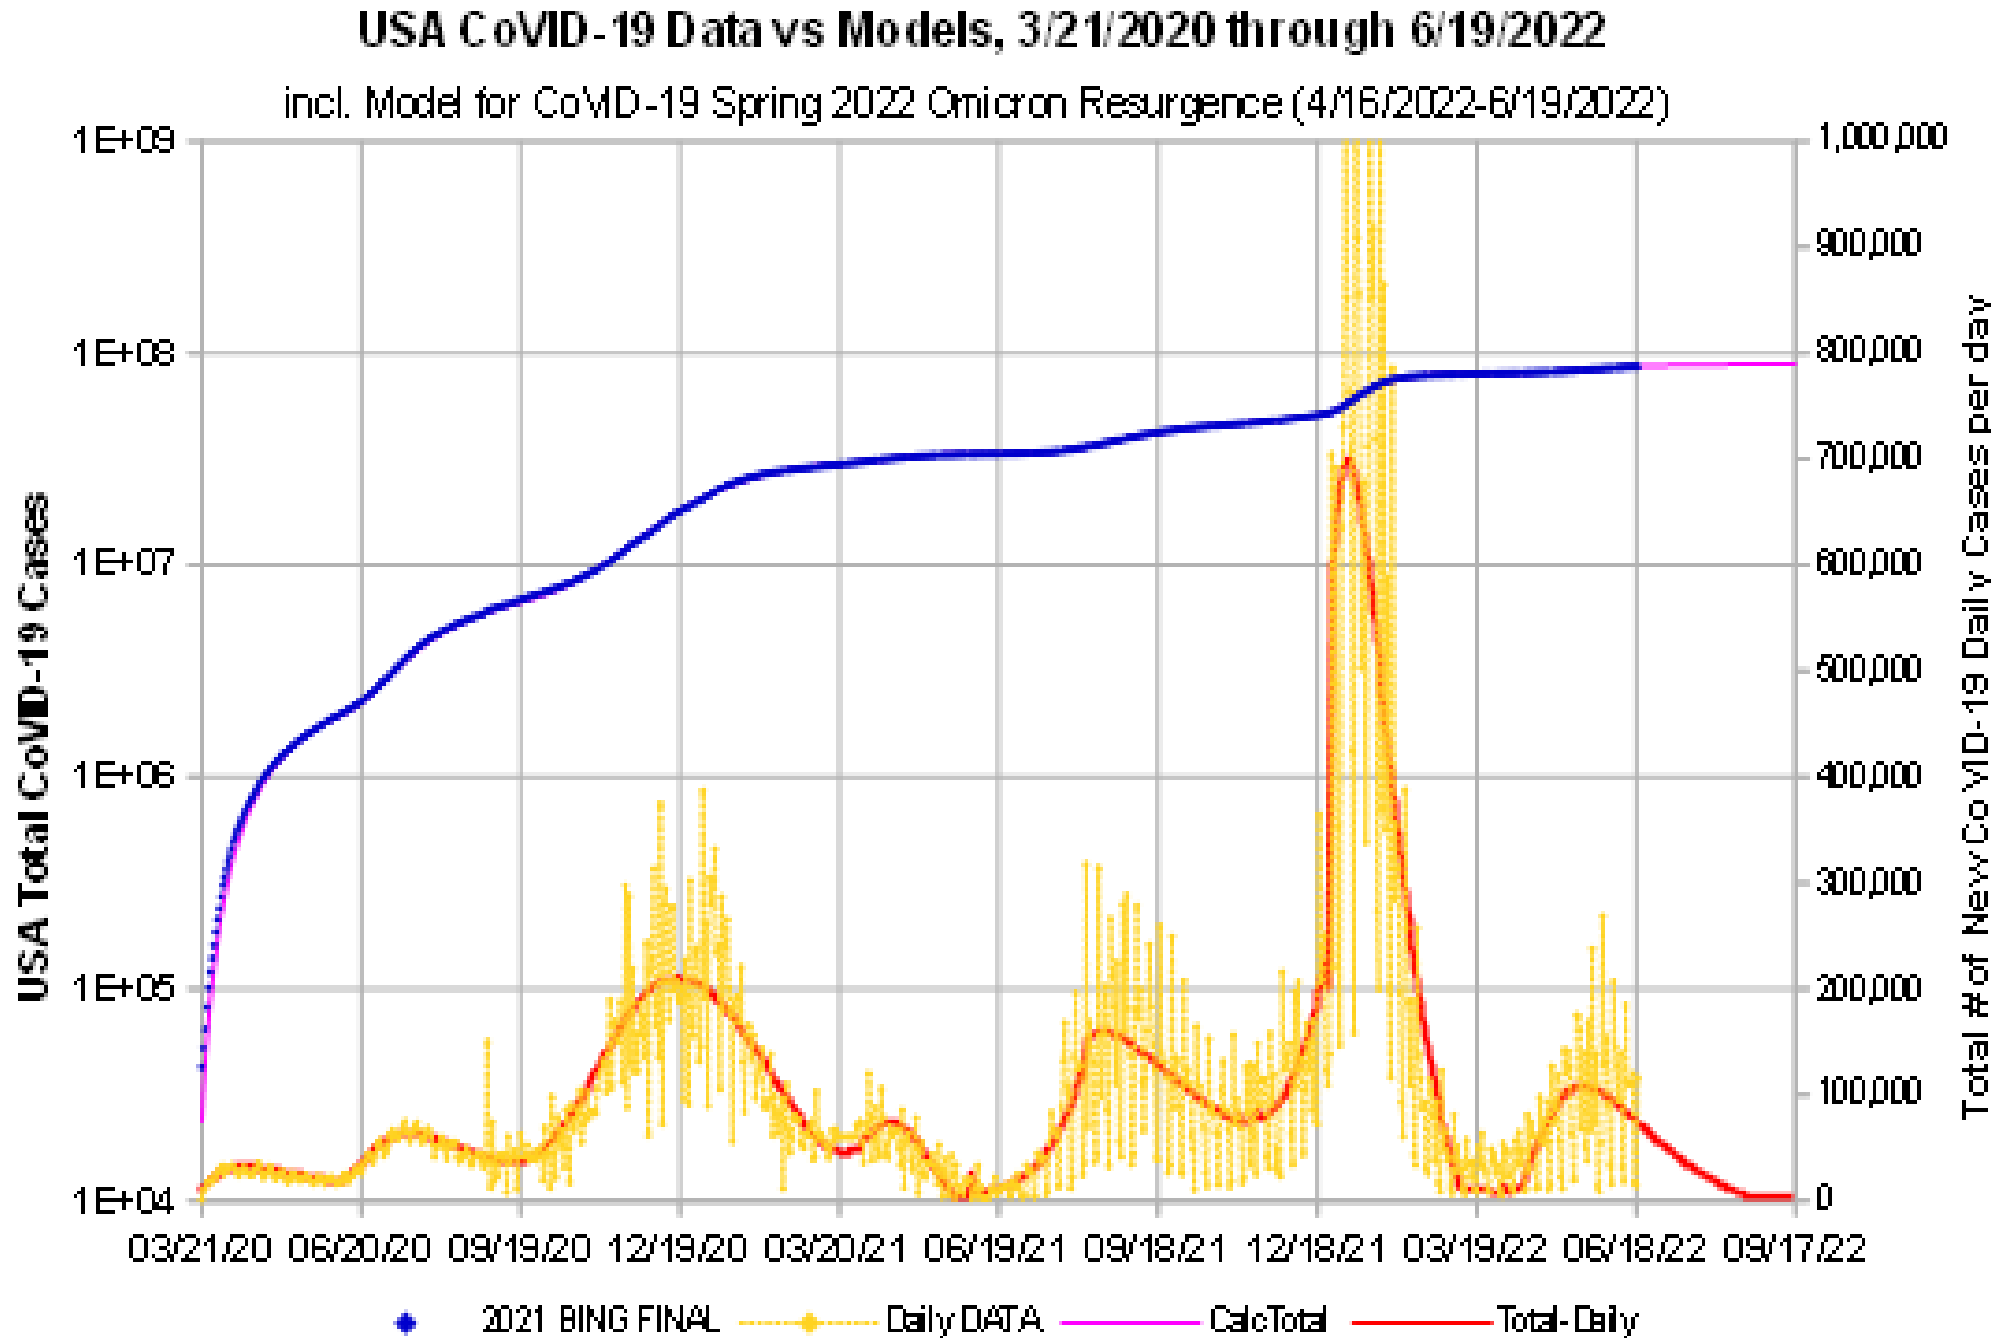

**Fig. 5: Summary of CoVID-19 Model and Parameter Values**

| CoVID Wave | U.S.A. CoVID-19 Stage                              | $N_0$ , (Initial $t=0$ Value) | $t=0$ Date | $t/dbl \backslash$ days, at $t=0$ | $t_R$ value | $\alpha_S$ value | $\delta_o$ value |
|------------|----------------------------------------------------|-------------------------------|------------|-----------------------------------|-------------|------------------|------------------|
| 1          | Ini.Model 6/7/20 Update                            | 23,710                        | 03/21/20   | 1.997                             | 2.88044     | 0.06618          | 0.00000          |
| 2          | 1 <sup>st</sup> Resurgence Summer 2020 =>          | 15,650                        | 06/07/20   | 2.880                             | 4.15496     | 0.058__          | 0.0108_          |
| 3          | Winter 2020 Resurgence =>                          | 88,900                        | 09/25/20   | 5.580                             | 8.05__      | 0.011__          | 0.001748         |
| 4          | Small Spring 2021 Resurgence =>                    | 146,000                       | 03/19/21   | 5.580                             | 8.05__      | 0.00128          | 0.01365          |
| 5          | Initial Portion, Summer 2021 Resurgence =>         | 41,000                        | 06/07/21   | 9.089                             | 13.113_     | 0.0030_          | 0.00000          |
| 5-A        | LATTER Portion, Summer 2021 Resurgence =>          | 3,200,000                     | 08/13/21   | 14.443                            | 20.8374     | 0.019999         | 0.000489         |
| 6          | Initial Portion, Omicron Winter 2021 Resurgence => | 107,000                       | 11/15/21   | 5.580                             | 8.05__      | 0.011__          | 0.000001         |
| 6-A        | LATTER Portion, Omicron Winter 2021 Resurgence =>  | 3,000,000                     | 12/25/21   | 4.256                             | 6.14__      | 0.043__          | 0.00314_         |
| 7          | Omicron Spring 2022 Resurgence =>                  | 61,950                        | 04/16/22   | 2.461                             | 3.55__      | 0.043__          | 0.001145         |
